# Supplementary material for: Mucopolysaccharidosis type VI (MPS VI) and molecular analysis: Review and classification of published variants in the ARSB gene
Source: PubMed Central journal article supplement — Hum Mutat. 2018 Sep 17;39(12):1788–802. doi: 10.1002/humu.23613 (PMC6282714; doi:10.1002/humu.23613), 2018-09-17
Supplement: HUMU-39-1788-s001.pdf [file HUMU-39-1788-s001.pdf]

**Supplemental Material S4.** Variants and ethnicities of the most represented homozygote subjects

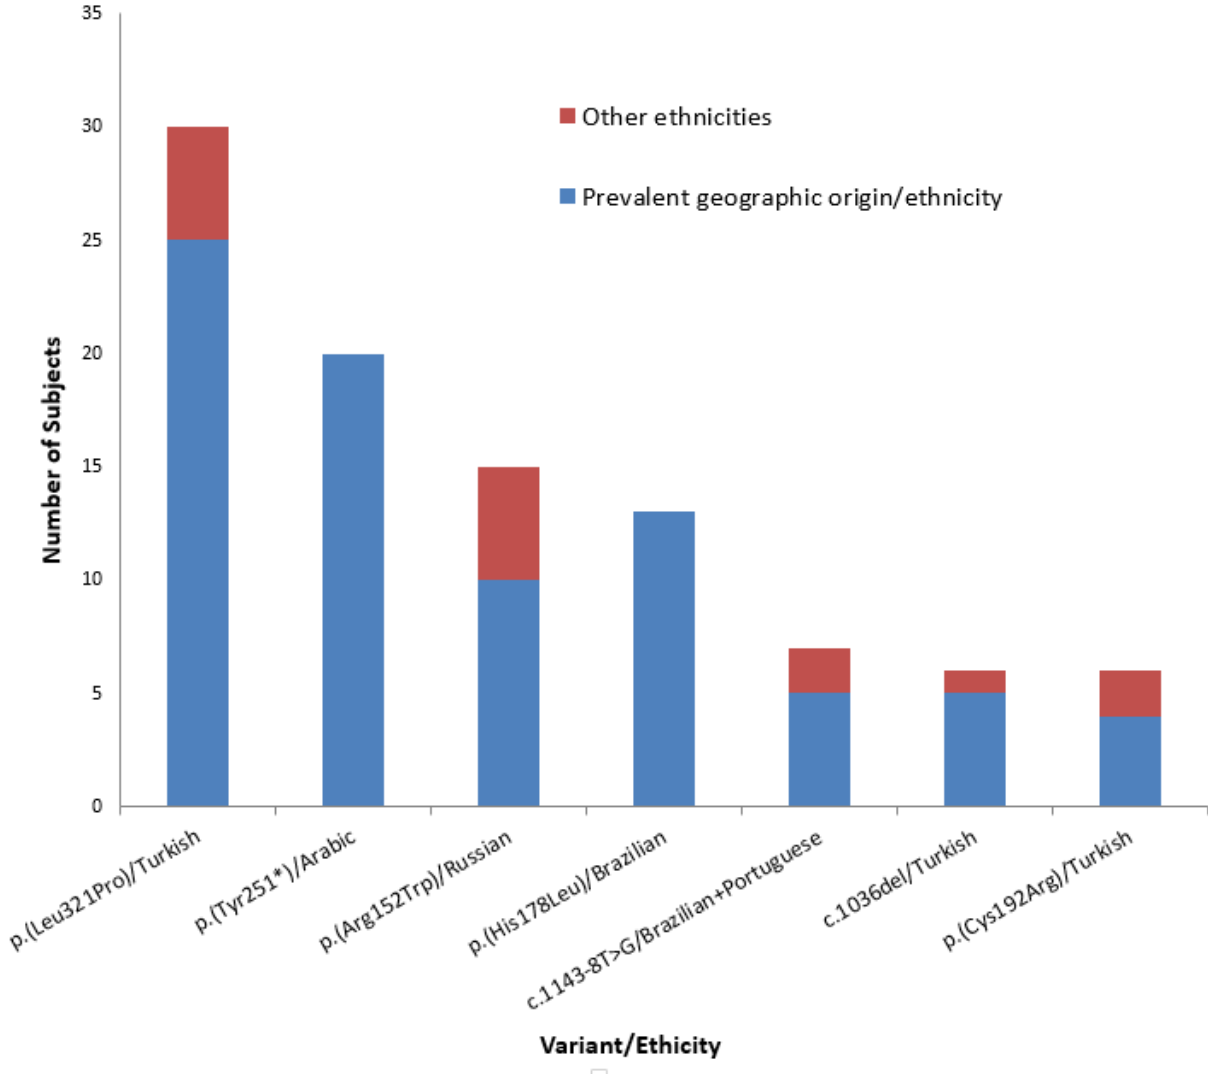

## Supplemental Material S1. Search Strategies

Primary search strategy:

('maroteaux lamy syndrome'/exp OR 'mps vi' OR 'maroteaux lamy' OR 'maroteaux lamy disease' OR 'maroteaux lamy syndrome' OR 'arylsulfatase b deficiency syndrome' OR 'mucopolysaccharidosis 6' OR 'mucopolysaccharidosis type 6' OR 'mucopolysaccharidosis type vi' OR 'mucopolysaccharidosis vi' OR 'n acetylgalactosamine 4 sulfatase deficiency syndrome' OR 'n acetylgalactosamine 4 sulfatase'/exp OR 'arylsulfatase b' OR 'chondroitinase' OR 'chondroitinases' OR 'chondroitinsulfatase' OR 'chondroitinsulfatases' OR 'e.c. 3.1.6.12' OR 'n acetyl d galactosamine 4 sulfatase' OR 'n acetyl d galactosamine 4 sulfatase' OR 'n acetyl d galactosamine 4 sulfatase' OR 'n acetyl d galactosamine 4 sulphate 4 sulfohydrolase' OR 'n acetyl d galactosamine 4 sulfatase' OR 'n acetyl d galactosamine 4 sulphate sulfohydrolase' OR 'n acetyl d galactosamine 4 sulphate sulfohydrolase' OR 'n acetyl d galactosamine 4 sulphate sulfatase' OR 'n acetyl d galactosamine 4 sulphate sulfatase' OR 'n-acetylgalactosamine-4-sulfatase') AND ('mutation'/exp OR 'gene alteration' OR 'genome mutation' OR 'mutation' OR 'gene mutation'/exp OR 'gene mutation' OR 'mutation, gene' OR 'genetic variability'/exp OR 'genetic variant' OR 'genotype variation' OR 'genotypic variation' OR 'arsb gene'/exp OR 'arsb gene' OR 'arsb gene mutation' OR 'indel mutation'/exp OR 'indel' OR 'indel mutation' OR 'indels' OR 'insertion and deletion' OR 'insertion deletion' OR 'insertions and deletions' OR 'insertions deletions' OR 'missense mutation'/exp OR 'missense mutation' OR 'mutation, missense' OR 'point mutation'/exp OR 'mutation, point' OR 'point mutation' OR 'frameshift mutation'/exp OR 'frameshift mutation' OR 'mutation, reading frame' OR 'reading frame mutation' OR 'reading frame shift' OR 'silent mutation'/exp OR 'silent mutation' OR 'nucleotide sequence'/exp OR 'base sequence' OR 'nucleic acid base sequence' OR 'nucleic acid sequence' OR 'nucleoside sequence' OR 'nucleotide base sequence' OR 'nucleotide sequence' OR 'oligonucleotide sequence' OR 'polynucleotide sequence' OR 'ribonucleotide sequence' OR 'sequence, base' OR 'genetic heterogeneity'/exp OR 'genetic heterogeneity' OR 'genetic heterogenicity' OR 'genotype heterogeneity' OR 'heterogeneity, genetic' OR 'heterogenicity, genetic' OR 'genotype'/exp OR 'genotype' OR 'genotyping' OR 'allele'/exp OR 'allele' OR 'alleles' OR 'allelic gene' OR 'allelomorph' OR 'gene, allelic' OR 'gene sequence'/exp OR 'gene sequence' OR 'gene sequencing' OR 'sequence, gene' OR 'sequencing, gene') AND 'human'/de AND ('article'/it OR 'article in press'/it OR 'review'/it)

**Supplemental Material S2.** Table reporting the genotypes of the patients analyzed.(.xls file)

### Supplemental Material S3. *ARSB* sequence variants identified in patients with MPS VI

(§Variants classified per Richards S, Aziz N, Bale S, et al. (2015). Standards and guidelines for the interpretation of sequence variants: a joint consensus recommendation of the American College of Medical Genetics and Genomics and the Association for Molecular Pathology. *Genet Med*, 17(5), 405-424. ClinVar accessed 06/05/2017)

| Exon/<br>Intron | Nucleotide<br>change (HGVS;<br>NM_000046.4) | Predicted amino<br>acid change | Numb<br>er of<br>repor<br>ts | Clinical<br>significance<br>§ | Variant<br>identifier<br>(ClinVar ID<br>and/or dbSNP<br>number, if<br>available) | Literature Reference                                                                                                                                                    | Notes |
|-----------------|---------------------------------------------|--------------------------------|------------------------------|-------------------------------|----------------------------------------------------------------------------------|-------------------------------------------------------------------------------------------------------------------------------------------------------------------------|-------|
| Exon 1          | c.98C>T                                     | p.(Ala33Val)                   | 1                            | Benign                        | ClinVar Allele<br>ID: 190201                                                     | Karageorgos (2007) <i>Hum<br/>Mutat</i> 28, 897                                                                                                                         |       |
| Exon 1          | c.108_120del                                | p.(Ser37Profs*15)              | 1                            | Likely<br>pathogenic          |                                                                                  | Karageorgos (2007) <i>Hum<br/>Mutat</i> 28, 897                                                                                                                         |       |
| Exon 1          | c.113_121del                                | p.(Gly38_Gly40del)             | 2                            | Benign                        |                                                                                  | Mathew (2015) <i>Mol<br/>Genet Metab Rep</i> 4, 53                                                                                                                      |       |
| Exon 1          | c.114del                                    | p.(Ala39Profs*17)              | 1                            | Likely<br>pathogenic          |                                                                                  | Karageorgos (2007) <i>Hum<br/>Mutat</i> 28, 897                                                                                                                         |       |
| Exon 1          | c.116_123del                                | p.(Ala39Glufs*85)              | 2                            | Pathogenic                    |                                                                                  | Karageorgos (2007) <i>Hum<br/>Mutat</i> 28, 897                                                                                                                         |       |
| Exon 1          | c.149T>A                                    | p.(Leu50Ter)                   | 1                            | Likely<br>pathogenic          |                                                                                  | Garcia (2010) <i>J Ped<br/>Rehab Med</i> 3, 63                                                                                                                          |       |
| Exon 1          | c.157G>A                                    | p.(Asp53Asn)                   | 6                            | Likely<br>pathogenic          |                                                                                  | Uttarilli (2015) <i>Indian J<br/>Med Res</i> 142, 414<br>Mathew (2015) <i>Mol<br/>Genet Metab Rep</i> 4, 53<br>Kantaputra (2014) <i>Am J<br/>Med Genet A</i> 164A, 1443 |       |
| Exon 1          | c.160G>A                                    | p.(Asp54Asn)                   | 5                            | Likely<br>pathogenic          |                                                                                  | Karageorgos (2007) <i>Hum<br/>Mutat</i> 28, 897<br>Zanetti (2014) <i>JIMD<br/>Rep</i> 14, 1<br>Uttarilli (2015) <i>Indian J<br/>Med Res</i> 142, 414                    |       |
| Exon 1          | c.167G>A                                    | p.(Gly56Asp)                   | 2                            | Uncertain<br>significance     |                                                                                  | Cobos (2015) <i>JIMD<br/>Rep</i> 15, 123                                                                                                                                |       |
| Exon 1          | c.171G>C                                    | p.(Trp57Cys)                   | 2                            | Uncertain<br>significance     |                                                                                  | Karageorgos (2007) <i>Hum<br/>Mutat</i> 28, 897<br>Jurecka (2012) <i>Mol Genet<br/>Metab</i> 105, 237<br>Jurecka (2014) <i>Ped Intl</i><br>56, 520                      |       |
| Exon 1          | c.175G>A                                    | p.(Asp59Asn)                   | 2                            | Uncertain<br>significance     |                                                                                  | Petry (2005) <i>J Inherit<br/>Metab Dis</i> 28, 1027<br>Horovitz (2015) <i>Mol Gen<br/>Metab Rep</i> 5, 19                                                              |       |
| Exon 1          | c.176A>T                                    | p.(Asp59Val)                   | 2                            | Likely<br>pathogenic          |                                                                                  | Debiec (2014) <i>J Am Soc<br/>Nephrol</i> 25, 675                                                                                                                       |       |
| Exon 1          | c.194C>T                                    | p.(Ser65Phe)                   | 2                            | Uncertain<br>significance     |                                                                                  | Villani (1999) <i>Biochim<br/>Biophys Acta</i> 1453, 185                                                                                                                |       |
| Exon 1          | c.206C> T                                   | p.(Thr69Met)                   | 1                            | Uncertain<br>significance     |                                                                                  | McGill (2010) <i>Clin Genet</i><br>5, 492                                                                                                                               |       |
| Exon 1          | c.207_213dup                                | p.(Leu72Alafs*57)              | 2                            | Likely<br>pathogenic          |                                                                                  | Sandberg (2008) <i>Mol<br/>Genet Metab</i> 93, S34                                                                                                                      |       |
| Exon 1          | c.208_215del                                | p.(Pro70Glyfs*54)              | 2                            | Pathogenic                    |                                                                                  | Kantaputra (2014) <i>Am J<br/>Med Genet A</i> 164A, 1443                                                                                                                |       |

|        |              |                   |    |                        |                                       |                                                                                                                                                                        |  |
|--------|--------------|-------------------|----|------------------------|---------------------------------------|------------------------------------------------------------------------------------------------------------------------------------------------------------------------|--|
| Exon 1 | c.215T>A     | p.(Leu72Gln)      | 1  | Uncertain significance |                                       | Isbrandt (1996) Hum Mutat 7, 361                                                                                                                                       |  |
| Exon 1 | c.215T>C     | p.(Leu72Pro)      | 2  | Uncertain significance | ClinVar Allele ID: 15922              | Jurecka (2014) Ped Intl 56, 520                                                                                                                                        |  |
| Exon 1 | c.215T>G     | p.(Leu72Arg)      | 13 | Likely pathogenic      |                                       | Petry (2005) J Inherit Metab Dis 28, 1027<br>Karageorgos (2007) Hum Mutat 28, 897<br>Karageorgos (2007) Mol Genet Metab 90, 164<br>Zheng (2014) Chin J Pediatr 52, 403 |  |
| Exon 1 | c.219del     | p.(Asp73Glnfs*41) | 1  | Likely pathogenic      |                                       | Isbrandt (1996) Hum Mutat 7, 361                                                                                                                                       |  |
| Exon 1 | c.223_232del | p.(Leu75Alafs*36) | 1  | Likely pathogenic      |                                       | Isbrandt (1996) Hum Mutat 7, 361                                                                                                                                       |  |
| Exon 1 | c.236G>A     | p.(Gly79Glu)      | 2  | Uncertain significance |                                       | Kilic (2017) Am J Med GenetA 173A, 2954                                                                                                                                |  |
| Exon 1 | c.237_243del | p.(Val80Trpfs*32) | 1  | Likely pathogenic      |                                       | Voskoboeva (1994) Hum Genet 93, 259<br>Voskoboeva (2000) Genetika 6, 837<br>Garrido (2007) Mol Genet Metab 92, 122<br>Jurecka (2013) Am J Med Genet A 161A, 1291       |  |
| Exon 1 | c.238del     | p.(Val80Cysfs*34) | 6  | Pathogenic             | ClinVar Allele ID: 15920; rs750845916 | Litjens (1992) Hum Mutat 1, 397<br>Garrido (2007) Mol Genet Metab 92, 122<br>Karageorgos (2007) Mol Genet Metab 90, 164<br>Karageorgos (2007) Hum Mutat 28, 897        |  |
| Exon 1 | c.245del     | p.(Leu82Argfs*32) | 2  | Likely pathogenic      |                                       | Voskoboeva (2000) Genetika 6, 837<br>Karageorgos (2007) Hum Mutat 28, 897                                                                                              |  |
| Exon 1 | c.245T>G     | p.(Leu82Arg)      | 3  | Likely pathogenic      | rs750845916                           | Garrido (2007) Mol Genet Metab 92, 122<br>Di Natale (2008) Biotechnol Appl Biochem 49, 219<br>Zanetti (2009) Eur J Hum Genet 17, 1160                                  |  |
| Exon 1 | c.246G>A     | p.(Leu82Leu)      | 1  | Uncertain significance |                                       | Karageorgos (2007) Hum Mutat 28, 897                                                                                                                                   |  |
| Exon 1 | c.247_248del | p.(Asp83Glnfs*43) | 1  | Likely pathogenic      |                                       | Jurecka (2014) Ped Intl 56, 520                                                                                                                                        |  |
| Exon 1 | c.247G>T     | p.(Asp83Tyr)      | 1  | Uncertain significance |                                       | Karageorgos (2007) Hum Mutat 28, 897                                                                                                                                   |  |
| Exon 1 | c.253T>C     | p.(Tyr85His)      | 4  | Likely pathogenic      |                                       | Furujo (2011) Mol Genet Metab 104, 597                                                                                                                                 |  |
| Exon 1 | c.260C>G     | p.(Thr87Arg)      | 2  | Uncertain significance |                                       | Pollard (2013) J Inherit Metab Dis 36, 179                                                                                                                             |  |

|        |              |                   |   |                        |                          |                                                                                                                                                                        |                             |
|--------|--------------|-------------------|---|------------------------|--------------------------|------------------------------------------------------------------------------------------------------------------------------------------------------------------------|-----------------------------|
| Exon 1 | c.262C>T     | p.(Gln88Ter)      | 4 | Pathogenic             |                          | Jurecka (2011) Cent Eur J Med 6, 163<br>Jurecka (2013) Am J Med GenetA 161A, 1291<br>Jurecka (2014) Ped Intl 56, 520<br>Chistiakov (2014) Clin Chim Acta 436C, 112     |                             |
| Exon 1 | c.263dup     | p.(Pro89Alafs*38) | 1 | Likely pathogenic      |                          | Jurecka (2014) Ped Intl 56, 520<br>Jurecka (2014) Clin Rheumatol 33, 725                                                                                               |                             |
| Exon 1 | c.264G>C     | p.(Gln88His)      | 1 | Uncertain significance |                          | Petry (2005) J Inherit Metab Dis 28, 1027                                                                                                                              |                             |
| Exon 1 | c.270_274del | p.(Cys91Alafs*34) | 2 | Pathogenic             |                          | Al-Sannaa (2018) J Community Genet 9, 65                                                                                                                               |                             |
| Exon 1 | c.271T>C     | p.(Cys91Arg)      | 2 | Uncertain significance |                          | Mathew (2015) Mol Genet Metab Rep 4, 53                                                                                                                                |                             |
| Exon 1 | (c.272G>A)   | p.(Cys91Tyr)      | 1 | Uncertain significance |                          | Jurecka (2014) Ped Intl 56, 520                                                                                                                                        | c. annotation was predicted |
| Exon 1 | c.275C>A     | p.(Thr92Lys)      | 9 | Uncertain significance |                          | Karageorgos (2007) Hum Mutat 28, 897<br>Jurecka (2012) Mol Genet Metab 105, 237<br>Jurecka (2014) Ped Intl 56, 520<br>Cobos (2015) JIMD Rep 15, 123                    |                             |
| Exon 1 | c.275C>T     | p.(Thr92Met)      | 2 | Uncertain significance |                          | Litjens (1996) Am J Hum Genet 58, 1127<br>Pollard (2013) J Inherit Metab Dis 36, 179                                                                                   |                             |
| Exon 1 | c.277C>T     | p.(Pro93Ser)      | 1 | Uncertain significance |                          | Petry (2005) J Inherit Metab Dis 28, 1027                                                                                                                              |                             |
| Exon 1 | c.278C>T     | p.(Pro93Leu)      | 2 | Uncertain significance | rs118203942              | Okamura (2013) J Dermatol 40, 758                                                                                                                                      |                             |
| Exon 1 | c.284G>A     | p.(Arg95Gln)      | 6 | Likely pathogenic      | ClinVar Allele ID: 15923 | Litjens (1996) Am J Hum Genet 58, 1127<br>Karageorgos (2007) Mol Genet Metab 90, 164<br>Karageorgos (2007) Hum Mutat 28, 897<br>Garrido (2007) Mol Genet Metab 92, 122 |                             |
| Exon 1 | c.288C>G     | p.(Ser96Arg)      | 1 | Uncertain significance |                          | Karageorgos (2007) Hum Mutat 28, 897                                                                                                                                   |                             |
| Exon 1 | c.289C>T     | p.(Gln97Ter)      | 4 | Likely pathogenic      |                          | Karageorgos (2004) Hum Mutat 23, 229<br>Karageorgos (2007) Hum Mutat 28, 897<br>Jurecka (2012) Mol Genet Metab 105, 237<br>Jurecka (2014) Ped Intl 56, 520             |                             |
| Exon 1 | c.293T>A     | p.(Leu98Gln)      | 4 | Likely pathogenic      |                          | Karageorgos (2007) Hum Mutat 28, 897                                                                                                                                   |                             |
| Exon 1 | c.293T>C     | p.(Leu98Pro)      | 2 | Uncertain significance |                          | Voskoboeva (2000) Genetika 6, 837<br>Cobos (2015) JIMD Rep 15, 123                                                                                                     |                             |

|           |                                 |                            |   |                        |                           |                                                                                                                                   |                                                  |
|-----------|---------------------------------|----------------------------|---|------------------------|---------------------------|-----------------------------------------------------------------------------------------------------------------------------------|--------------------------------------------------|
| Exon 1    | c.293T>G                        | p. (Leu98Arg)              | 8 | Likely pathogenic      |                           | Uttarilli (2015) Indian J Med Res 142, 414<br>Mathew (2015) Mol Genet Metab Rep 4, 53                                             |                                                  |
| Exon 1    | c.305G>A                        | p.(Arg102His)              | 2 | Uncertain significance |                           | Karageorgos (2007) Mol Genet Metab 90, 164<br>Karageorgos (2007) Hum Mutat 28, 897                                                |                                                  |
| Exon 1    | c.307_312+147del                | ---                        | 2 | Pathogenic             |                           |                                                                                                                                   |                                                  |
| Exon 1    | c.312G>C                        | p.(Gln104His)              | 4 | Uncertain significance | rs150087888               | Karageorgos (2007) Hum Mutat 28, 897<br>Thümler (2012) J Inherit Metab Dis 35, 1071<br>Pollard (2013) J Inherit Metab Dis 36, 179 |                                                  |
| Exons 2-3 | c.313-7412_690+1601del          | ---                        | 2 | Likely pathogenic      |                           | Ittiwut (2017) Genet Test Mol Biomarkers 21, 58                                                                                   | Deletion of exon 2-3 with defined breakpoints    |
| Exons 2-3 | c.(312+1_313-1)(690+1_691-1)del | ---                        | 2 | Likely pathogenic      |                           | Zheng (2014) Chin J Pediatr 52, 403                                                                                               | Deletion of exon 2-3 without defined breakpoints |
| Exon 2    | c.317G>A                        | p.(Arg106His)              | 1 | Uncertain significance | rs768802200               | Karageorgos (2007) Hum Mutat 28, 897                                                                                              |                                                  |
| Exon 2    | c.323G>T                        | p.(Gly108Val)              | 1 | Uncertain significance |                           | Karageorgos (2007) Mol Genet Metab 90, 164                                                                                        |                                                  |
| Exon 2    | c.328C>T                        | p.(Gln110*)                | 1 | Likely pathogenic      |                           | Chistiakov (2014) Clin Chim Acta 436C, 112                                                                                        |                                                  |
| Exon 2    | c.332A>C                        | p.(His111Pro)              | 5 | Uncertain significance | rs775780931               | Giraldo (2016) Meta Gene 7, 83                                                                                                    |                                                  |
| Exon 2    | Not given                       | p.(Ile114Ile)              | 1 | Uncertain significance |                           | Villani (1999) Biochim Biophys Acta 1453, 185                                                                                     |                                                  |
| Exon 2    | c.347C>A                        | p.(Pro116His)              | 2 | Uncertain significance | rs118203939               | Villani (1999) Biochim Biophys Acta 1453, 185                                                                                     |                                                  |
| Exon 2    | c.349T>C                        | p.(Cys117Arg)              | 6 | Likely pathogenic      | ClinVar Allele ID: 15917  | Jin (1992) Am J Hum Genet 50, 795<br>Karageorgos (2007) Hum Mutat 28, 897                                                         |                                                  |
| Exon 2    | c.356_358del                    | p.(Pro119_Ser120delinsArg) | 1 | Uncertain significance |                           | Karageorgos (2004) Hum Mutat 23, 229<br>Karageorgos (2007) Hum Mutat 28, 897                                                      |                                                  |
| Exon 2    | c.361T>C                        | p.(Cys121Arg)              | 1 | Uncertain significance |                           | Giraldo (2016) Meta Gene 7, 83                                                                                                    |                                                  |
| Exon 2    | Not given                       | p.(Leu124Leu)              | 1 | Uncertain significance |                           | Villani (1999) Biochim Biophys Acta 1453, 185                                                                                     |                                                  |
| Exon 2    | c.375dup                        | p.(Glu126*)                | 1 | Likely pathogenic      |                           | Jurecka (2012) Mol Genet Metab 105, 237<br>Jurecka (2014) Ped Intl 56, 520                                                        |                                                  |
| Exon 2    | c.384_386del                    | p.(Leu129del)              | 3 | Uncertain significance | ClinVar Allele ID: 106583 | Fernández-Marmiesse (2014) Orphanet J Rare Dis 9, 59<br>Giraldo (2016) Meta Gene 7, 83                                            |                                                  |
| Exon 2    | c.389C>T                        | p.(Pro130Leu)              | 1 | Uncertain significance |                           | Karageorgos (2007) Mol Genet Metab 90, 164<br>Karageorgos (2007) Hum Mutat 28, 897                                                |                                                  |

|        |          |                    |    |                        |                          |                                                                                                                                                                                                                                                                           |  |
|--------|----------|--------------------|----|------------------------|--------------------------|---------------------------------------------------------------------------------------------------------------------------------------------------------------------------------------------------------------------------------------------------------------------------|--|
| Exon 2 | c.395T>C | p.(Leu132Pro)      | 3  | Likely pathogenic      |                          | Lin (2008) Clin Chim Acta 394, 89                                                                                                                                                                                                                                         |  |
| Exon 2 | c.410G>T | p.(Gly137Val)      | 2  | Pathogenic             | ClinVar Allele ID: 15916 | Wicker (1991) J Biol Chem 266, 21386                                                                                                                                                                                                                                      |  |
| Exon 2 | c.413A>G | p.(Tyr138Cys)      | 1  | Uncertain significance |                          | Garrido (2007) Mol Genet Metab 92, 122                                                                                                                                                                                                                                    |  |
| Exon 2 | c.418A>C | p.(Thr140Pro)      | 1  | Uncertain significance |                          | Karageorgos (2007) Hum Mutat 28, 897                                                                                                                                                                                                                                      |  |
| Exon 2 | c.426G>C | p.(Met142Ile)      | 1  | Uncertain significance | rs766914147              | Simonaro (1995) Biochim Biophys Acta 1272, 129                                                                                                                                                                                                                            |  |
| Exon 2 | c.427del | p.(Val143Serfs*41) | 12 | Pathogenic             | rs746206847              | Karageorgos (2004) Hum Mutat 23, 229<br>Petry (2005) J Inherit Metab Dis 28, 1027<br>Garrido (2007) Mol Genet Metab 92, 122<br>Karageorgos (2007) Hum Mutat 28, 897<br>Jurecka (2013) Am J Med Genet A 161A, 1291<br>Fernández-Marmiesse (2014) Orphanet J Rare Dis 9, 59 |  |
| Exon 2 | c.430G>A | p.(Gly144Arg)      | 8  | Likely pathogenic      |                          | Isbrandt (1994) Am J Hum Genet 54, 454<br>Petry (2005) J Inherit Metab Dis 28, 1027<br>Karageorgos (2007) Hum Mutat 28, 897<br>Chistiakov (2014) Clin Chim Acta 436C, 112<br>Giraldo (2016) Meta Gene 7, 83                                                               |  |
| Exon 2 | c.436T>C | p.(Trp146Arg)      | 1  | Uncertain significance |                          | Simonaro (1995) Biochim Biophys Acta 1272, 129                                                                                                                                                                                                                            |  |
| Exon 2 | c.437G>T | p.(Trp146Leu)      | 1  | Uncertain significance | rs757061042              | Simonaro (1995) Biochim Biophys Acta 1272, 129                                                                                                                                                                                                                            |  |
| Exon 2 | c.437G>C | p.(Trp146Ser)      | 2  | Uncertain significance |                          | Simonaro (1995) Biochim Biophys Acta 1272, 129                                                                                                                                                                                                                            |  |
| Exon 2 | c.438G>A | p.(Trp146*)        | 4  | Likely pathogenic      |                          | Voskoboeva (2000) Genetika 6, 837<br>Karageorgos (2007) Hum Mutat 28, 897<br>Thümler (2012) J Inherit Metab Dis 35, 1071                                                                                                                                                  |  |
| Exon 2 | c.440A>C | p.(His147Pro)      | 2  | Uncertain significance |                          | Giraldo (2016) Meta Gene 7, 83                                                                                                                                                                                                                                            |  |

|        |              |               |    |                        |  |                                                                                                                                                                                                                                                                                                                                                                                                                                                                                                                                                                                                       |  |
|--------|--------------|---------------|----|------------------------|--|-------------------------------------------------------------------------------------------------------------------------------------------------------------------------------------------------------------------------------------------------------------------------------------------------------------------------------------------------------------------------------------------------------------------------------------------------------------------------------------------------------------------------------------------------------------------------------------------------------|--|
| Exon 2 | c.454C>T     | p.(Arg152Trp) | 62 | Pathogenic             |  | Voskoboeva (1994) Hum Genet 93, 259<br>Voskoboeva (2000) Genetika 6, 837<br>Karageorgos (2007) Hum Mutat 28, 897<br>Jurecka (2011) Cent Eur J Med 6, 163<br>Jurecka (2011) Mol Genet Metab 104, 695<br>Jurecka (2012) Mol Genet Metab 105, 237<br>Thümler (2012) J Inherit Metab Dis 35, 1071<br>Brands (2013) Orphanet J Rare Dis 8, 51<br>Jurecka (2013) Am J Med Genet A 161, 1291<br>Jurecka (2014) Ped Intl 56, 520<br>Chistiakov (2014) Clin Chim Acta 436C, 112<br>Ferla (2015) Hum Gene Ther 26, 145<br>Ebbink (2016) J Inherit Metab Dis 39, 285<br>Oussoren (2017) Mol Genet Metab 121, 241 |  |
| Exon 2 | c.464G>A     | p.(Cys155Tyr) | 3  | Uncertain significance |  | Ittiwut (2017) Genet Test Mol Biomarkers 21, 58                                                                                                                                                                                                                                                                                                                                                                                                                                                                                                                                                       |  |
| Exon 2 | c.478C>T     | p.(Arg160*)   | 16 | Pathogenic             |  | Voskoboeva (1994) Hum Genet 93, 259<br>Voskoboeva (2000) Genetika 6, 837<br>Garrido (2007) Mol Genet Metab 92, 122<br>Karageorgos (2007) Hum Mutat 28, 897<br>Jurecka (2012) Mol Genet Metab 105, 237<br>Thümler (2012) J Inherit Metab Dis 35, 1071<br>Jurecka (2014) Ped Intl 56, 520<br>Jurecka (2014) Clin Rheumatol 33, 725<br>Kilic (2017) Am J Med Genet A 173, 2954                                                                                                                                                                                                                           |  |
| Exon 2 | c.479G>A     | p.(Arg160Gln) | 13 | Likely pathogenic      |  | Voskoboeva (1994) Hum Genet 93, 259<br>Voskoboeva (2000) Genetika 6, 837<br>Karageorgos (2007) Hum Mutat 28, 897<br>Garrido (2007) Mol Genet Metab 92, 122<br>Jurecka (2012) Mol Genet Metab 105, 237<br>Kantaputra (2014) Am J Med Genet A 164A, 1443<br>Jurecka (2014) Ped Intl 56, 520<br>Mathew (2015) Mol Genet Metab Rep 4, 53<br>Ittiwut (2017) Genet Test Mol Biomarkers 21, 58                                                                                                                                                                                                               |  |
| Exon 2 | c.489_491del | p.(Thr164del) | 1  | Uncertain significance |  | Karageorgos (2007) Hum Mutat 28, 897                                                                                                                                                                                                                                                                                                                                                                                                                                                                                                                                                                  |  |



|        |          |                 |    |                        |             |                                                                                                                                                                                                                                                                                                                                                                              |  |
|--------|----------|-----------------|----|------------------------|-------------|------------------------------------------------------------------------------------------------------------------------------------------------------------------------------------------------------------------------------------------------------------------------------------------------------------------------------------------------------------------------------|--|
| Exon 2 | c.498del | p.(Phe166fs*18) | 2  | Pathogenic             |             | Uttarilli (2015) Indian J Med Res 142, 414                                                                                                                                                                                                                                                                                                                                   |  |
| Exon 2 | c.499G>A | p.(Gly167Arg)   | 5  | Uncertain significance |             | Jurecka (2012) Mol Genet Metab 105, 237<br>Jurecka (2014) Ped Intl 56, 520<br>Zheng (2014) Chin J Pediatr 52, 403                                                                                                                                                                                                                                                            |  |
| Exon 3 | c.509T>G | p.(Leu170Arg)   | 1  | Likely pathogenic      |             | Dou (2006) Clin Chim Acta 374, 171                                                                                                                                                                                                                                                                                                                                           |  |
| Exon 3 | c.511G>A | p.(Gly171Ser)   | 3  | Likely pathogenic      |             | Karageorgos (2007) Mol Genet Metab 90, 164<br>Karageorgos (2007) Hum Mutat 28, 897                                                                                                                                                                                                                                                                                           |  |
| Exon 3 | c.523T>G | p.(Tyr175Asp)   | 1  | Uncertain significance |             | Zheng (2014) Chin J Pediatr 52, 403                                                                                                                                                                                                                                                                                                                                          |  |
| Exon 3 | c.532C>G | p.(His178Asp)   | 2  | Likely pathogenic      |             | Zanetti (2014) JIMD Rep 14, 1                                                                                                                                                                                                                                                                                                                                                |  |
| Exon 3 | c.533A>T | p.(His178Leu)   | 29 | Likely pathogenic      |             | Karageorgos (2007) Hum Mutat 28, 897<br>Costa-Motta (2011) Mol Genet Metab 104, 603<br>Costa-Motta (2014) Hum Hered 77, 189<br>Horovitz (2015) Mol Gen Metab Rep 5, 19                                                                                                                                                                                                       |  |
| Exon 3 | c.571C>T | p.(Arg191*)     | 7  | Pathogenic             |             | Karageorgos (2007) Mol Genet Metab 90, 164<br>Karageorgos (2007) Hum Mutat 28, 897<br>Ferla (2015) Hum Gene Ther 26, 145                                                                                                                                                                                                                                                     |  |
| Exon 3 | c.574T>C | p.(Cys192Arg)   | 15 | Likely pathogenic      |             | Isbrandt (1994) Am J Hum Genet 54, 454<br>Wu (2000) Hum Mutat 15, 389<br>Yang (2001) J Formos Med Assoc 100, 820<br>Karageorgos (2007) Hum Mutat 28, 897<br>Lin (2008) Clin Chim Acta 394, 89<br>Wang (2008) World J Pediatr 4, 152<br>Thümler (2012) J Inherit Metab Dis 35, 1071<br>Jester S (2013) Orphanet J Rare Dis; 8:134.<br>Kilic (2017) Am J Med Genet A 173, 2954 |  |
| Exon 3 | c.589C>T | p.(Arg197*)     | 5  | Pathogenic             | rs118203943 | Petry (2005) J Inherit Metab Dis 28, 1027<br>Dou (2006) Clin Chim Acta 374, 171<br>Karageorgos (2007) Hum Mutat 28, 897                                                                                                                                                                                                                                                      |  |

|          |                                 |                |    |                        |                          |                                                                                                                                                                                                                                                                                                                                                                                                                                                                                                                                                                                                                                                                                                                                                                  |                                               |
|----------|---------------------------------|----------------|----|------------------------|--------------------------|------------------------------------------------------------------------------------------------------------------------------------------------------------------------------------------------------------------------------------------------------------------------------------------------------------------------------------------------------------------------------------------------------------------------------------------------------------------------------------------------------------------------------------------------------------------------------------------------------------------------------------------------------------------------------------------------------------------------------------------------------------------|-----------------------------------------------|
| Exon 3   | c.629A>G                        | p.(Tyr210Cys)  | 46 | Pathogenic             | ClinVar Allele ID: 15924 | Litjens (1996) Am J Hum Genet 58, 1127<br>Voskoboeva (2000) Genetika 6, 837<br>Bradford (2002) Biochemistry 41, 4962<br>Karageorgos (2004) Hum Mutat 23, 229<br>Karageorgos (2007) Hum Mutat 28, 897<br>Sandberg (2008) Mol Genet Metab 93, S34<br>Scarpa (2010) J Ped Rehab Med 3, 71<br>Gottwald (2011) Mol Genet Metab 103, 300<br>Jurecka (2011) Cent Eur J Med 6, 163<br>Jurecka (2012) Mol Genet Metab 105, 237<br>Thümler (2012) J Inherit Metab Dis 35, 1071<br>Brands (2013) Orphanet J Rare Dis 8, 51<br>Mendelsohn (2013) JIMD Rep 11, 125<br>Jurecka (2014) Ped Intl 56, 520<br>Jurecka (2014) Clin Rheumatol 33, 725<br>Ferla (2015) Hum Gene Ther 26, 145<br>Ebbink (2016) J Inherit Metab Dis 39, 285<br>Oussoren (2017) Mol Genet Metab 121, 241 |                                               |
| Exon 3   | c.630_636del                    | p.(Tyr210*)    | 1  | Likely pathogenic      |                          | Karageorgos (2007) Hum Mutat 28, 897                                                                                                                                                                                                                                                                                                                                                                                                                                                                                                                                                                                                                                                                                                                             |                                               |
| Exon 3   | Not given                       | p.(Thr212Ile)  | 2  | Uncertain significance |                          | Sandberg (2008) Mol Genet Metab 93, S34                                                                                                                                                                                                                                                                                                                                                                                                                                                                                                                                                                                                                                                                                                                          | Prediction of c. annotation is c.635C>T       |
| Exon 3   | c.659_660del                    | p.(Ile220fs*5) | 1  | Likely pathogenic      | rs367650121              | Uttarilli (2015) Indian J Med Res 142, 414                                                                                                                                                                                                                                                                                                                                                                                                                                                                                                                                                                                                                                                                                                                       |                                               |
| Exon 3   | c.667A>G                        | p.(Ile223Val)  | 2  | Likely pathogenic      |                          | Karageorgos (2007) Hum Mutat 28, 897                                                                                                                                                                                                                                                                                                                                                                                                                                                                                                                                                                                                                                                                                                                             |                                               |
| Exon 4   | c.(690+1_691-1)(898+1_899-1)del | ---            | 2  | Pathogenic             |                          | Lin (2015) Tohoku J Exp Med 235, 267                                                                                                                                                                                                                                                                                                                                                                                                                                                                                                                                                                                                                                                                                                                             | Deletion of exon 4 without defined boundaries |
| Intron 3 | c.691-1G>A                      | ---            | 3  | Likely pathogenic      | rs6870443                | Cobos (2015) JIMD Rep 15, 123                                                                                                                                                                                                                                                                                                                                                                                                                                                                                                                                                                                                                                                                                                                                    |                                               |
| Exon 4   | c.707T>C                        | p.(Leu236Pro)  | 2  | Uncertain significance | ClinVar Allele ID: 15918 | Karageorgos (2004) Hum Mutat 23, 229<br>Karageorgos (2007) Hum Mutat 28, 897<br>Jin (1992) Am J Hum Genet 50, 795                                                                                                                                                                                                                                                                                                                                                                                                                                                                                                                                                                                                                                                |                                               |
| Exon 4   | c.710C>A                        | p.(Ala237Asp)  | 4  | Likely benign          |                          | Brands (2013) Orphanet J Rare Dis 8, 51<br>Uttarilli (2015) Indian J Med Res 142, 414                                                                                                                                                                                                                                                                                                                                                                                                                                                                                                                                                                                                                                                                            |                                               |
| Exon 4   | c.716A>G                        | p.(Gln239Arg)  | 3  | Uncertain significance |                          | Wu (2000) Hum Mutat 15, 389<br>Lin (2008) Clin Chim Acta 394, 89<br>Wang (2008) World J Pediatr 4, 152<br>Yang (2001) J Formos Med Assoc 100, 820                                                                                                                                                                                                                                                                                                                                                                                                                                                                                                                                                                                                                |                                               |

|        |                                   |                    |    |                        |                          |                                                                                                                                                           |                                               |
|--------|-----------------------------------|--------------------|----|------------------------|--------------------------|-----------------------------------------------------------------------------------------------------------------------------------------------------------|-----------------------------------------------|
| Exon 4 | c.719C>T                          | p.(Ser240Phe)      | 1  | Uncertain significance |                          | Garrido (2007) Mol Genet Metab 92, 122                                                                                                                    |                                               |
| Exon 4 | c.725A>C                          | p.(His242Pro)      | 1  | Uncertain significance |                          | Di Natale (2008) Biotechnol Appl Biochem 49, 219<br>Ferla (2015) Hum Gene Ther 26, 145                                                                    |                                               |
| Exon 4 | c.743del                          | p.(Pro248Leufs*5)  | 1  | Pathogenic             | ClinVar Allele ID: 15921 | Isbrandt (1996) Hum Mutat 7, 361                                                                                                                          |                                               |
| Exon 4 | c.750_754delins CCTGAAGTC AAG     | p.(Glu250Aspfs*9)  | 2  | Likely pathogenic      |                          | Jurecka (2012) Mol Genet Metab 105, 237<br>Jurecka (2012) Pediatr Neurosurg 48, 191<br>Jurecka (2014) Ped Intl 56, 520                                    |                                               |
| Exon 4 | c.750_754delins CCTGAAG           | p.(Glu250Aspfs*4)  | 2  | Likely pathogenic      |                          | Jurecka (2011) Cent Eur J Med 6, 163                                                                                                                      |                                               |
| Exon 4 | c.753C>G                          | p.(Tyr251*)        | 43 | Pathogenic             |                          | Sillence (2011) JIMD Rep 2, 103<br>Cobos (2015) JIMD Rep 15, 123<br>Al-Sannaa (2018) J Community Genet 9, 65                                              |                                               |
| Exon 4 | c.765T>A                          | p.(Tyr255*)        | 4  | Likely pathogenic      | rs749015246              | Lam (2004) Chin Med J 117, 1850<br>But (2011) Hong Kong Med J 17, 317<br>Zheng (2014) Chin J Pediatr 52, 403                                              |                                               |
| Exon 4 | c.785dup                          | p.(Asn262Lysfs*14) | 1  | Likely pathogenic      |                          | Chistiakov (2014) Clin Chim Acta 436C, 112                                                                                                                |                                               |
| Exon 4 | c.797A>C                          | p.(Tyr266Ser)      | 7  | Uncertain significance |                          | Jurecka (2012) Mol Genet Metab 105, 237<br>Jurecka (2014) Ped Intl 56, 520                                                                                |                                               |
| Exon 4 | c.803G>T                          | p.(Gly268Val)      | 1  | Uncertain significance |                          | Karageorgos (2007) Hum Mutat 28, 897                                                                                                                      |                                               |
| Exon 4 | c.883_884dup                      | p.(Ile296Serfs*43) | 2  | Likely pathogenic      |                          | Ferla (2015) Hum Gene Ther 26, 145                                                                                                                        |                                               |
| Exon 4 | c.887T>A                          | p.(Ile296Asn)      | 2  | Likely pathogenic      |                          | Karageorgos (2007) Hum Mutat 28, 897                                                                                                                      |                                               |
| Exon 5 | c.(898+1_899-1)(1142+1_1143-1)del | ---                | 6  | Pathogenic             |                          | Arlt (1994) J Biol Chem 269, 9638<br>Garrido (2007) Mol Genet Metab 92, 122<br>Karageorgos (2007) Hum Mutat 28, 897<br>Ferla (2015) Hum Gene Ther 26, 145 | Deletion of exon 5 without defined boundaries |
| Exon 5 | c.899-1341_1142+1051del           | ---                | 1  | Pathogenic             |                          | Villani (2010) Genet Test MolBiomarkers 14, 113                                                                                                           | Deletion of exon 5 with defined boundaries    |
| Exon 5 | c.900T>A                          | p.(Asp300Glu)      | 1  | Uncertain significance |                          | Karageorgos (2007) Hum Mutat 28, 897                                                                                                                      |                                               |
| Exon 5 | c.900T>G                          | p.(Asp300Glu)      | 2  | Uncertain significance |                          | Giraldo (2016) Meta Gene 7, 83                                                                                                                            |                                               |

|        |          |               |    |                        |             |                                                                                                                                                                                                                                                                                                                                                 |
|--------|----------|---------------|----|------------------------|-------------|-------------------------------------------------------------------------------------------------------------------------------------------------------------------------------------------------------------------------------------------------------------------------------------------------------------------------------------------------|
| Exon 5 | c.903C>G | p.(Asn301Lys) | 4  | Likely pathogenic      | rs779378413 | Brands (2013) Orphanet J Rare Dis 8, 51<br>Zanetti (2014) JIMD Rep 14, 1<br>Ferla (2015) Hum Gene Ther 26, 145<br>Ebbink (2016) J Inherit Metab Dis 39, 285                                                                                                                                                                                     |
| Exon 5 | c.904G>A | p.(Gly302Arg) | 10 | Uncertain significance |             | Villani (1997) Hum Mutat 11, 410<br>Karageorgos (2007) Mol Genet Metab 90, 164<br>Scarpa (2010) J Ped Rehab Med 3, 71<br>Jurecka (2012) Mol Genet Metab 105, 237<br>Jurecka (2014) Ped Intl 56, 520<br>Giraldo (2016) Meta Gene 7, 83                                                                                                           |
| Exon 5 | c.908G>A | p.(Gly303Glu) | 5  | Likely pathogenic      |             | Lin (2008) Clin Chim Acta 394, 89<br>Zheng (2014) Chin J Pediatr 52, 403<br>Ferla (2015) Hum Gene Ther 26, 145                                                                                                                                                                                                                                  |
| Exon 5 | c.922G>A | p.(Gly308Arg) | 1  | Uncertain significance |             | Garrido (2007) Mol Genet Metab 92, 122                                                                                                                                                                                                                                                                                                          |
| Exon 5 | c.923G>A | p.(Gly308Glu) | 1  | Uncertain significance | rs749989641 | Cobos (2015) JIMD Rep 15, 123                                                                                                                                                                                                                                                                                                                   |
| Exon 5 | c.937C>G | p.(Pro313Ala) | 11 | Likely pathogenic      |             | Brooks (2005) Mol Genet Metab 85, 236<br>Garrido (2007) Mol Genet Metab 92, 122<br>Karageorgos (2007) Hum Mutat 28, 897<br>Jurecka (2013) Am J Med Genet A 161A, 1291<br>Brands (2013) Orphanet J Rare Dis 8, 51<br>Ferla (2015) Hum Gene Ther 26, 145<br>Ebbink (2016) J Inherit Metab Dis 39, 285<br>Oussoren (2017) Mol Genet Metab 121, 241 |
| Exon 5 | c.937C>T | p.(Pro313Ser) | 1  | Uncertain significance |             | Karageorgos (2007) Hum Mutat 28, 897                                                                                                                                                                                                                                                                                                            |
| Exon 5 | c.943C>T | p.(Arg315*)   | 10 | Likely pathogenic      | rs727503809 | Voskoboeva (2000) Genetika 6, 837<br>Lin (2008) Clin Chim Acta 394, 89<br>Di Natale (2008) Biotechnol Appl Biochem 49, 219<br>Villani (2010) Genet Test Mol Biomarkers 14, 113<br>Chistiakov (2014) Clin Chim Acta 436C, 112<br>Jurecka (2014) Ped Intl 56, 520<br>Ferla (2015) Hum Gene Ther 26, 145                                           |

|        |          |               |    |                        |                                       |                                                                                                                                                                                                                                                                                                                                                                   |  |
|--------|----------|---------------|----|------------------------|---------------------------------------|-------------------------------------------------------------------------------------------------------------------------------------------------------------------------------------------------------------------------------------------------------------------------------------------------------------------------------------------------------------------|--|
| Exon 5 | c.944G>A | p.(Arg315Gln) | 22 | Likely pathogenic      | ClinVar Allele ID: 177363             | Villani (1999) Biochim Biophys Acta 1453, 185<br>Karageorgos (2004) Hum Mutat 23, 229<br>Petry (2005) J Inherit Metab Dis 28, 1027<br>Garrido (2007) Mol Genet Metab 92, 122<br>Karageorgos (2007) Mol Genet Metab 90, 164<br>Karageorgos (2007) Hum Mutat 28, 897<br>Di Natale (2008) Biotechnol Appl Biochem 49, 219<br>Zanetti (2009) Eur J Hum Genet 17, 1160 |  |
| Exon 5 | c.944G>C | p.(Arg315Pro) | 4  | Uncertain significance |                                       | Mathew (2015) Mol Genet Metab Rep 4, 53                                                                                                                                                                                                                                                                                                                           |  |
| Exon 5 | c.960C>G | p.(Ser320Arg) | 3  | Uncertain significance |                                       | Voskoboeva (2000) Genetika 6, 837<br>Uttarilli (2015) Indian J Med Res 142, 414                                                                                                                                                                                                                                                                                   |  |
| Exon 5 | c.962T>C | p.(Leu321Pro) | 60 | Pathogenic             |                                       | Isbrandt (1994) Am J Hum Genet 54, 454<br>Karageorgos (2004) Hum Mutat 23, 229<br>Karageorgos (2007) Hum Mutat 28, 897<br>Chistiakov (2014) Clin Chim Acta 436C, 112<br>Kantaputra (2014) Am J Med Genet A 164A, 1443<br>Zanetti (2014) JIMD Rep 14, 1<br>Cobos (2015) JIMD Rep 15, 123<br>Ferla (2015) Hum Gene Ther 26, 145                                     |  |
| Exon 5 | c.966G>A | p.(Trp322*)   | 2  | Pathogenic             | rs398123125                           | Garrido (2007) Mol Genet Metab 92, 122<br>Giraldo (2016) Meta Gene 7, 83                                                                                                                                                                                                                                                                                          |  |
| Exon 5 | c.971G>T | p.(Gly324Val) | 5  | Likely pathogenic      | ClinVar Allele ID: 98267; rs773492223 | Karageorgos (2007) Hum Mutat 28, 897<br>Brands (2013) Orphanet J Rare Dis 8, 51<br>Ferla (2015) Hum Gene Ther 26, 145<br>Ebbink (2016) J Inherit Metab Dis 39, 285                                                                                                                                                                                                |  |
| Exon 5 | c.979C>T | p.(Arg327*)   | 16 | Pathogenic             | rs201168448                           | Karageorgos (2004) Hum Mutat 23, 229<br>Karageorgos (2007) Hum Mutat 28, 897<br>Brands (2013) Orphanet J Rare Dis 8, 51<br>Zheng (2014) Chin J Pediatr 52, 403<br>Ferla (2015) Hum Gene Ther 26, 145<br>Kaissi (2016) Medicine 95, 32<br>Ebbink (2016) J Inherit Metab Dis 39, 285<br>Oussoren (2017) Mol Genet Metab 121, 241                                    |  |

|        |             |                     |    |                        |  |                                                                                                                                                                                                                     |                                          |
|--------|-------------|---------------------|----|------------------------|--|---------------------------------------------------------------------------------------------------------------------------------------------------------------------------------------------------------------------|------------------------------------------|
| Exon 5 | c.995T>G    | p.(Val332Gly)       | 2  | Likely pathogenic      |  | Brands (2013) Orphanet J Rare Dis 8, 51<br>Ferla (2015) Hum Gene Ther 26, 145<br>Ebbink (2016) J Inherit Metab Dis 39, 285<br>Oussoren (2017) Mol Genet Metab 121, 241                                              |                                          |
| Exon 5 | c.1001G>T   | p.(Ser334Ile)       | 3  | Uncertain significance |  | Giraldo (2016) Meta Gene 7, 83                                                                                                                                                                                      |                                          |
| Exon 5 | c.1028A>T   | p.(Lys343Met)       | 1  | Uncertain significance |  | Karageorgos (2007) Hum Mutat 28, 897                                                                                                                                                                                |                                          |
| Exon 5 | c.1032C>G   | p.(Asn344Lys)       | 1  | Uncertain significance |  | Karageorgos (2007) Hum Mutat 28, 897                                                                                                                                                                                |                                          |
| Exon 5 | c.1036del   | p.(Glu346Serfs*11)  | 13 | Pathogenic             |  | Karageorgos (2007) Hum Mutat 28, 897<br>Zanetti (2014) JIMD Rep 14, 1<br>Ferla (2015) Hum Gene Ther 26, 145<br>Kilic (2017) Am J Med Genet 173A, 2954                                                               |                                          |
| Exon 5 | c.1048A>T   | p.(Ile350Phe)       | 2  | Pathogenic             |  | Uttarilli (2017) Gene 599, 19                                                                                                                                                                                       |                                          |
| Exon 5 | c.1052C>T   | p.(Ser351Phe)       | 2  | Pathogenic             |  | Pollard (2013) J Inherit Metab Dis 36, 179                                                                                                                                                                          |                                          |
| Exon 5 | c.1057T>A   | p.(Trp353Arg)       | 2  | Uncertain significance |  | Karageorgos (2007) Mol Genet Metab 90, 164<br>Karageorgos (2007) Hum Mutat 28, 897<br>Zanetti (2014) JIMD Rep 14, 1                                                                                                 |                                          |
| Exon 5 | c.1059G>A   | p.(Trp353*)         | 2  | Pathogenic             |  | Uttarilli (2015) Indian J Med Res 142, 414                                                                                                                                                                          |                                          |
| Exon 5 | c.1079T>C   | p.(Leu360Pro)       | 6  | Likely pathogenic      |  | Voskoboeva (2000) Genetika 6, 837<br>Jurecka (2013) Am J Med Genet A 161A, 1291<br>Jurecka (2014) Ped Intl 56, 520<br>Zanetti (2014) JIMD Rep 14, 1                                                                 |                                          |
| Exon 5 | Not given   | p.(Asp372Gly)       | 1  | Uncertain significance |  | But (2011) Hong Kong Med J17, 317                                                                                                                                                                                   | Prediction of c. annotation is c.1115A>G |
| Exon 5 | c.1127T>A   | p.(Val376Glu)       | 4  | Likely pathogenic      |  | Kantaputra (2014) Am J Med Genet A 164A, 1443<br>Cobos (2015) JIMD Rep 15, 123                                                                                                                                      |                                          |
| Exon 5 | c.1130G>A   | p.(Trp377*)         | 1  | Likely pathogenic      |  | Karageorgos (2007) Hum Mutat 28, 897                                                                                                                                                                                |                                          |
| Exon 5 | c.1142+1G>T | ---                 | 2  | Pathogenic             |  | Karageorgos (2007) Hum Mutat 28, 897                                                                                                                                                                                |                                          |
| Exon 5 | c.1142+2T>A | p.(Asp300Valfs*193) | 2  | Likely pathogenic      |  | Garrido (2007) Mol Genet Metab 92, 122                                                                                                                                                                              |                                          |
| Exon 5 | c.1142+2T>C | ---                 | 4  | Pathogenic             |  | Brands (2013) Am J Med Genet A 161A, 2550<br>Brands (2013) Orphanet J Rare Dis 8, 51<br>Ferla (2015) Hum Gene Ther 26, 145<br>Ebbink (2016) J Inherit Metab Dis 39, 285<br>Oussoren (2017) Mol Genet Metab 121, 241 |                                          |

|          |             |                    |    |                        |                                       |                                                                                                                                                                                                                                                                                                    |
|----------|-------------|--------------------|----|------------------------|---------------------------------------|----------------------------------------------------------------------------------------------------------------------------------------------------------------------------------------------------------------------------------------------------------------------------------------------------|
| Intron 5 | c.1143-1G>C | p.(Ser381Argfs*12) | 16 | Pathogenic             | ClinVar Allele ID: 15926              | Garrido (2007) Mol Genet Metab 92, 122<br>Karageorgos (2007) Hum Mutat 28, 897<br>Giraldo (2016) Meta Gene 7, 83                                                                                                                                                                                   |
| Intron 5 | c.1143-8T>G | p.(Ser381Argfs*12) | 24 | Likely pathogenic      | ClinVar Allele ID: 15927; rs431905496 | Petry (2005) J Inherit Metab Dis 28, 1027<br>Garrido (2007) Mol Genet Metab 92, 122<br>Karageorgos (2007) Hum Mutat 28, 897<br>Garcia (2010) J Ped Rehab Med 3, 63<br>Leal (2014) Cardiol Young 24, 229<br>Horovitz (2015) Mol Gen Metab Rep 5, 19<br>Franco (2016) Genet Mol Res 15, gmr.15017850 |
| Exon 6   | c.1151G>A   | p.(Ser384Asn)      | 9  | Benign                 | ClinVar Allele ID: 98263; rs25414     | Voskoboeva (2000) Genetika 6, 837<br>Karageorgos (2004) Hum Mutat 23, 229<br>Petry (2005) J Inherit Metab Dis 28, 1027<br>Karageorgos (2007) Hum Mutat 28, 897<br>Karageorgos (2007) Mol Genet Metab 90, 164<br>Chistiakov (2014) Clin Chim Acta 436C, 112                                         |
| Exon 6   | c.1161dup   | p.(Arg388Glnfs*3)  | 1  | Likely pathogenic      |                                       | Karageorgos (2007) Hum Mutat 28, 897                                                                                                                                                                                                                                                               |
| Exon 6   | c.1163G>C   | p.(Arg388Thr)      | 1  | Uncertain significance |                                       | Ittiwut (2017) Genet Test Mol Biomarkers 21, 58                                                                                                                                                                                                                                                    |
| Exon 6   | c.1168G>A   | p.(Glu390Lys)      | 6  | Likely pathogenic      |                                       | Kantaputra (2014) Am J Med Genet A 164A, 1443<br>Ferla (2015) Hum Gene Ther 26, 145<br>Kilic (2017) Am J Med Genet 173A, 2954                                                                                                                                                                      |
| Exon 6   | c.1178A>C   | p.(His393Pro)      | 10 | Uncertain significance | ClinVar Allele ID: 15925              | Litjens (1996) Am J Hum Genet 58, 1127<br>Bradford (2002) Biochemistry 41, 4962<br>Karageorgos (2007) Hum Mutat 28, 897<br>Karageorgos (2007) Mol Genet Metab 90, 164<br>McGill (2010) Clin Genet 5, 492                                                                                           |
| Exon 6   | c.1178A>G   | p.(His393Arg)      | 3  | Uncertain significance |                                       | Ferla (2015) Hum Gene Ther 26, 145<br>Uttarilli (2015) Indian J Med Res 142, 414                                                                                                                                                                                                                   |
| Exon 6   | c.1195T>C   | p.(Phe399Leu)      | 1  | Uncertain significance | rs762979755                           | Pollard (2013) J Inherit Metab Dis 36, 179                                                                                                                                                                                                                                                         |

|          |             |                     |    |                        |                                       |                                                                                                                                                                                                                                           |  |
|----------|-------------|---------------------|----|------------------------|---------------------------------------|-------------------------------------------------------------------------------------------------------------------------------------------------------------------------------------------------------------------------------------------|--|
| Exon 6   | c.1197C>G   | p.(Phe399Leu)       | 17 | Likely pathogenic      | rs200793396                           | Yang (2001) J Formos Med Assoc 100, 820<br>Lam (2004) Chin Med J 117, 1850<br>Lin (2008) Clin Chim Acta 394, 89<br>But (2011) Hong Kong Med J17, 317<br>Pollard (2013) J Inherit Metab Dis 36, 179<br>Zheng (2014) Chin J Pediatr 52, 403 |  |
| Exon 6   | c.1208C>G   | p.(Ser403*)         | 1  | Pathogenic             |                                       | Zheng (2014) Chin J Pediatr 52, 403                                                                                                                                                                                                       |  |
| Exon 6   | c.1208del   | p.(Ser403Tyrfs*171) | 2  | Pathogenic             |                                       | Kantaputra (2014) Am J Med Genet A 164A, 1443                                                                                                                                                                                             |  |
| Intron 6 | c.1213+5G>A | ---                 | 2  | Uncertain significance |                                       | Karageorgos (2007) Mol Genet Metab 90, 164<br>Karageorgos (2007) Hum Mutat 28, 897                                                                                                                                                        |  |
| Intron 6 | c.1213+6T>C | ---                 | 3  | Pathogenic             |                                       | Di Natale (2008) Biotechnol Appl Biochem 49, 219<br>Ferla (2015) Hum Gene Ther 26, 145                                                                                                                                                    |  |
| Intron 6 | c.1214-2A>G | ---                 | 1  | Likely pathogenic      |                                       | Karageorgos (2007) Mol Genet Metab 90, 164<br>Karageorgos (2007) Hum Mutat 28, 897<br>Zanetti (2014) JIMD Rep 14, 1                                                                                                                       |  |
| Exon 7   | c.1214G>A   | p.(Cys405Tyr)       | 3  | Uncertain significance | ClinVar Allele ID: 15919; rs118203941 | Jin (1992) Am J Hum Genet 50, 795<br>Karageorgos (2007) Hum Mutat 28, 897                                                                                                                                                                 |  |
| Exon 7   | c.1261G>T   | p.(Glu421*)         | 2  | Pathogenic             |                                       | Xu (1996) Hokkaido Igaku Zasshi 71, 359                                                                                                                                                                                                   |  |
| Exon 7   | c.1279del   | p.(Thr427Hisfs*147) | 1  | Likely pathogenic      |                                       | Petry (2005) J Inherit Metab Dis 28, 1027                                                                                                                                                                                                 |  |
| Exon 7   | c.1286dup   | p.(His430Profs*5)   | 2  | Likely pathogenic      |                                       | Isbrandt (1994) Am J Hum Genet 54, 454                                                                                                                                                                                                    |  |
| Exon 7   | c.1288C>A   | p.(His430Asn)       | 1  | Uncertain significance |                                       | Lin (2008) Clin Chim Acta 394, 89                                                                                                                                                                                                         |  |
| Exon 7   | c.1289A>G   | p.(His430Arg)       | 3  | Likely pathogenic      |                                       | Karageorgos (2007) Mol Genet Metab 90, 164<br>Karageorgos (2007) Hum Mutat 28, 897                                                                                                                                                        |  |
| Exon 7   | c.1301G>T   | p.(Arg434Ile)       | 1  | Uncertain significance |                                       | Karageorgos (2007) Hum Mutat 28, 897                                                                                                                                                                                                      |  |
| Exon 7   | c.1315A>G   | p.(Lys439Glu)       | 1  | Uncertain significance |                                       | Karageorgos (2007) Hum Mutat 28, 897                                                                                                                                                                                                      |  |
| Exon 7   | c.1325C>T   | p.(Thr442Met)       | 3  | Uncertain significance | ClinVar Allele ID: 368534             | Karageorgos (2007) Hum Mutat 28, 897<br>Zheng (2014) Chin J Pediatr 52, 403                                                                                                                                                               |  |
| Exon 7   | c.1334C>T   | p.(Pro445Leu)       | 2  | Uncertain significance |                                       | Kantaputra (2014) Am J Med Genet A 164A, 1443                                                                                                                                                                                             |  |



|          |             |                    |    |                        |                           |                                                                                                                                        |  |
|----------|-------------|--------------------|----|------------------------|---------------------------|----------------------------------------------------------------------------------------------------------------------------------------|--|
| Intron 7 | c.1336+2T>G |                    | 7  | Pathogenic             | rs768012515               | Karageorgos (2004) Hum Mutat 23, 229<br>Karageorgos (2007) Hum Mutat 28, 897<br>Chistiakov (2014) Clin Chim Acta 436C, 112             |  |
| Exon 7   | c.1336G>A   | p.(Gly446Ser)      | 3  | Uncertain significance |                           | Garcia (2010) J Ped Rehab Med 3, 63<br>Giraldo (2016) Meta Gene 7, 83                                                                  |  |
| Exon 7   | c.1336G>C   | p.(Gly446Arg)      | 1  | Uncertain significance |                           | Karageorgos (2007) Mol Genet Metab 90, 164<br>Karageorgos (2007) Hum Mutat 28, 897                                                     |  |
| Exon 8   | c.1340G>C   | p.(Cys447Ser)      | 1  | Uncertain significance |                           | Karageorgos (2007) Hum Mutat 28, 897                                                                                                   |  |
| Exon 8   | c.1340G>T   | p.(Cys447Phe)      | 4  | Uncertain significance |                           | Garrido (2007) Mol Genet Metab 92, 122<br>Karageorgos (2007) Hum Mutat 28, 897<br>Giraldo (2016) Meta Gene 7, 83                       |  |
| Exon 8   | c.1349G>T   | p.(Trp450Leu)      | 4  | Uncertain significance |                           | Uttarilli (2015) Indian J Med Res 142, 414                                                                                             |  |
| Exon 8   | c.1350G>C   | p.(Trp450Cys)      | 11 | Likely pathogenic      | rs555785323               | Kantaputra (2014) Am J Med Genet A 164A, 1443<br>Uttarilli (2015) Indian J Med Res 142, 414<br>Mathew (2015) Mol Genet Metab Rep 4, 53 |  |
| Exon 8   | c.1366C>T   | p.(Gln456*)        | 4  | Pathogenic             | rs200188234               | Villani (1997) Hum Mutat 11, 410<br>Karageorgos (2007) Hum Mutat 28, 897                                                               |  |
| Exon 8   | c.1391C>A   | p.(Ser464*)        | 1  | Likely pathogenic      |                           | Zheng (2014) Chin J Pediatr 52, 403                                                                                                    |  |
| Exon 8   | c.1394C>G   | p.(Ser465*)        | 1  | Likely pathogenic      |                           | Lin (2008) Clin Chim Acta 394, 89                                                                                                      |  |
| Exon 8   | c.1415T>C   | p.(Leu472Pro)      | 2  | Likely pathogenic      |                           | Garrido (2007) Mol Genet Metab 92, 122<br>Karageorgos (2007) Hum Mutat 28, 897                                                         |  |
| Exon 8   | c.1442C>T   | p.(Pro481Leu)      | 1  | Uncertain significance |                           | Brooks (2005) Mol Genet Metab 85, 236                                                                                                  |  |
| Exon 8   | c.1449A>T   | p.(Glu483Asp)      | 1  | Uncertain significance | ClinVar Allele ID: 406764 | Pollard (2013) J Inherit Metab Dis 36, 179                                                                                             |  |
| Exon 8   | c.1450A>G   | p.(Arg484Gly)      | 2  | Uncertain significance | ClinVar Allele ID: 187113 | Karageorgos (2004) Hum Mutat 23, 229<br>Karageorgos (2007) Hum Mutat 28, 897                                                           |  |
| Exon 8   | c.1457A>T   | p.(Asp486Val)      | 6  | Uncertain significance |                           | Nouri (2012) Iranian Biomed J 16, 169                                                                                                  |  |
| Exon 8   | c.1475del   | p.(Pro492Lysfs*80) | 1  | Likely pathogenic      |                           | Di Natale (2008) Biotechnol Appl Biochem 49, 219                                                                                       |  |
| Exon 8   | c.1482del   | p.(Ile494Metfs*80) | 1  | Likely pathogenic      |                           | Karageorgos (2007) Hum Mutat 28, 897                                                                                                   |  |
| Exon 8   | c.1493T>C   | p.(Leu498Pro)      | 1  | Likely pathogenic      | rs774358117               | Litjens (1996) Am J Hum Genet 58, 1127                                                                                                 |  |

|        |                |                      |    |                        |             |                                                                                                                                                                                                       |  |
|--------|----------------|----------------------|----|------------------------|-------------|-------------------------------------------------------------------------------------------------------------------------------------------------------------------------------------------------------|--|
| Exon 8 | c.1507C>T      | p.(Gln503*)          | 2  | Likely pathogenic      | rs771113472 | Villani (1999) Biochim Biophys Acta 1453, 185                                                                                                                                                         |  |
| Exon 8 | c.1515C>T      | p.(Tyr505Tyr)        | 1  | Uncertain significance |             | Karageorgos (2007) Hum Mutat 28, 897                                                                                                                                                                  |  |
| Exon 8 | c.1534_1556del | p.(Val512Profs*3)    | 13 | Uncertain significance |             | Petry (2005) J Inherit Metab Dis 28, 1027<br>Karageorgos (2007) Hum Mutat 28, 897<br>Garcia (2010) J Ped Rehab Med 3, 63<br>Giraldo (2016) Meta Gene 7, 83                                            |  |
| Exon 8 | c.1539C>G      | p.(Tyr513*)          | 1  | Likely pathogenic      |             | Voskoboeva (2000) Genetika 6, 837<br>Jurecka (2014) Ped Intl 56, 520                                                                                                                                  |  |
| Exon 8 | c.1562G>A      | p.(Cys521Tyr)        | 9  | Uncertain significance |             | Isbrandt (1994) Am J Hum Genet 54, 454<br>Voskoboeva (2000) Genetika 6, 837<br>Jurecka (2013) Am J Med Genet A 161A, 1291<br>Jurecka (2014) Ped Intl 56, 520<br>Jurecka (2014) Clin Rheumatol 33, 725 |  |
| Exon 8 | c.1577del      | p.(Thr526Metfs*48)   | 8  | Pathogenic             |             | Isbrandt (1994) Am J Hum Genet 54, 454<br>Kantaputra (2014) Am J Med Genet A 164A, 1443<br>Zanetti (2014) JIMD Rep 14, 1                                                                              |  |
| Exon 8 | c.1582_1596del | p.(Val528_Trp532del) | 2  | Uncertain significance |             | Karageorgos (2007) Hum Mutat 28, 897                                                                                                                                                                  |  |
| Exon 8 | c.1592C>G      | p.(Pro531Arg)        | 2  | Uncertain significance |             | Villani (1999) Biochim Biophys Acta 1453, 185                                                                                                                                                         |  |
| Exon 8 | c.1600T>C      | p.(*534Glnext*50)    | 1  | Uncertain significance |             | Arlt (1994) J Biol Chem 269, 9638                                                                                                                                                                     |  |
| Exon 8 | c.1601A>G      | p.(*534Trpext*50)    | 1  | Uncertain significance |             | Giraldo (2016) Meta Gene 7, 83                                                                                                                                                                        |  |

**Supplemental Material S5.** Most common *ARSB* variants obtained from gnomAD (.xls file)
